# Supplementary material for: The clinical benefit of array-based comparative genomic hybridization for detection of copy number variants in Czech children with intellectual disability and developmental delay
Source: BMC Med Genomics. 2019 Jul 23;12:111. doi: 10.1186/s12920-019-0559-7 (PMC6651926; doi:10.1186/s12920-019-0559-7)
Supplement: Supplementary file 4 — Children’s patients with two pathogenic/likely pathogenic CNVs. (XLSX 11 kb) [file 12920_2019_559_MOESM4_ESM.xlsx]

## Sheet: List1
Additional File 4: Children's patients with two pathogenic/likely pathogenic CNVs
Patient nr.	gender	age (yrs)	DNA microarray result	size (Mb)	OMIM „disease-causing“ genes	origin
151	M	9	arr[GRCh37] 2q12.1q12.3(104231457_107642735)x3,2q13(111408390_113210531)x3	3.411; 1.802	0;2	n/a
274	M	10	arr[GRCh37] 2q23.1q23.3(149208724_154131140)x1,7q21.12q21.13(88118032_89799946)x3	4.922; 1.682	5; 0	n/a
21	M	5	arr[GRCh36] 4q12q13.1(55663065_66340030)x1,9q21.1(79468507_80281960)x1	10.677; 0.813	8; 3	mat; mat
451	F	3	arr[GRCh37] 10q26.2q26.3(129173842_135404523)x1,11p15.1p14.3(17190929_23857589)x3	6.231; 6.667	4; 12	de novo; mat
380*	M	2	arr[GRCh37] 7q36.1q36.3(152261467_159088636)x1,12p13.33p13.31(230421_6554132)x3	6.827; 6.324	7; 12	de novo (pat)
430*	F	9	arr[GRCh37] 9p24.3p23(204193_10036486)x1,16q23.3q24.3(82006620_90163114)x3,(X)x1,(Y)x1	9.832; 8.156	10; 26	n/a
abbreviations: F = female, M = male, n/a = not assesed, mat = maternal, (pat) = paternally derived translocation
* The findings resulting from suspected cryptic unbalanced translocation
